# Supplementary material for: Effectiveness of EGFR/HER2-targeted drugs is influenced by the downstream interaction shifts of PTPIP51 in HER2-amplified breast cancer cells
Source: PubMed Central journal article supplement (PMC6107558; doi:10.1038/s41389-018-0075-1), 2018-08-24
Supplement: 41389_2018_75_MOESM1_ESM.pdf [file 41389_2018_75_MOESM1_ESM.pdf]

| <b>Table1.</b> List of antibodies          |                                                                                                                                                               |                       |        |          |                                                                      |
|--------------------------------------------|---------------------------------------------------------------------------------------------------------------------------------------------------------------|-----------------------|--------|----------|----------------------------------------------------------------------|
|                                            | Immunogen                                                                                                                                                     | Antibody source       | Clone  | Dilution | Manufacturer                                                         |
| PTPIP51(P51ab)                             | Human recombinant PTPIP51 protein encoding amino acids (aa) 131-470                                                                                           | Rabbit polyclonal     |        | 1:500    | Prof. HW Hofer, Biochemical Department, University Konstanz, Germany |
| tyrosine 176 phosphorylated PTPIP51 (PP51) | Purified total IgG fraction KLH-peptide conjugate                                                                                                             | Guinea pig polyclonal |        | 1:400    | BioLux, Stuttgart, Germany                                           |
| Raf-1                                      | Mapping the C-terminus of human origin                                                                                                                        | Mouse monoclonal      | E-10   | 1:100    | Santa Cruz Biotechnology Cat.# sc-7267                               |
| 14-3-3 $\beta$ (14.3.3)                    | Specific for an epitope mapping between aa 220-244 at the C-terminus of 14-3-3 $\beta$ of human origin                                                        | Mouse monoclonal      | A-6    | 1:100    | Santa Cruz Biotechnology Cat.# sc-25276                              |
| PTP1B                                      | epitope mapping at the N-terminus of PTP1B of human origin                                                                                                    | Goat polyclonal       | N-19   | 1:100    | Santa Cruz Biotechnology Cat.# sc-1718                               |
| c-Src                                      | specific for an epitope mapping between amino acids 1-30 at the N-terminus of c-Src p60 of human origin                                                       | Mouse monoclonal      | H-12   | 1:100    | Santa Cruz Biotechnology Cat.# sc-5266                               |
| GSK-3 $\beta$                              | raised against amino acids 345-420 mapping at the C-terminus of GSK-3 $\beta$ of human origin                                                                 | Mouse monoclonal      | E-11   | 1:100    | Santa Cruz Biotechnology Cat.# sc-377213                             |
| VAPB                                       | E.coli-derived recombinant human VAP-B Ala2-Pro132                                                                                                            | Mouse monoclonal      | 736904 | 1:100    | R&D systems Cat.# MAB58551                                           |
| Her2                                       | ERBB2 (NP_004439, 22aa ~ 121aa) partial recombinant protein with GST tag. MW of the GST tag alone is 26 KDa                                                   | Mouse monoclonal      | 22-121 | 1:100    | Abnova, Taipei, Taiwan Cat.# H0000 2064-M05                          |
| Phospho-Akt (Ser473)                       | a synthetic phosphopeptide corresponding to residues surrounding Ser473 of mouse Akt                                                                          | Rabbit monoclonal     |        | 1:2500   | Cell signaling technology #9271                                      |
| Phospho-p42/p44 MAPK                       | a synthetic phosphopeptide corresponding to residues surrounding Thr202/Tyr204 of human p44 MAP kinase                                                        | Rabbit monoclonal     |        | 1:2500   | Cell signaling technology #9111                                      |
| EGFR                                       | raised against plasma membranes of A431 cells                                                                                                                 | Mouse monoclonal      | 2E9    | 1:100    | Santa Cruz Biotechnology Cat.# sc-57091                              |
| Akt                                        | E. coli-derived recombinant human Akt1 Ser2-Ala480                                                                                                            | Mouse monoclonal      |        | 1:100    | R&D systems Cat.# MAB2055                                            |
| PKC                                        | recognizes an epitope located within the amino acid sequence 296-317, at the hinge region, close to or at the trypsin cleavage site of protein kinase C (PKC) | Mouse monoclonal      | MC5    | 1:100    | Sigma Aldrich Cat.# P5704                                            |

Supplementary Table 1 List of antibodies used for this study.

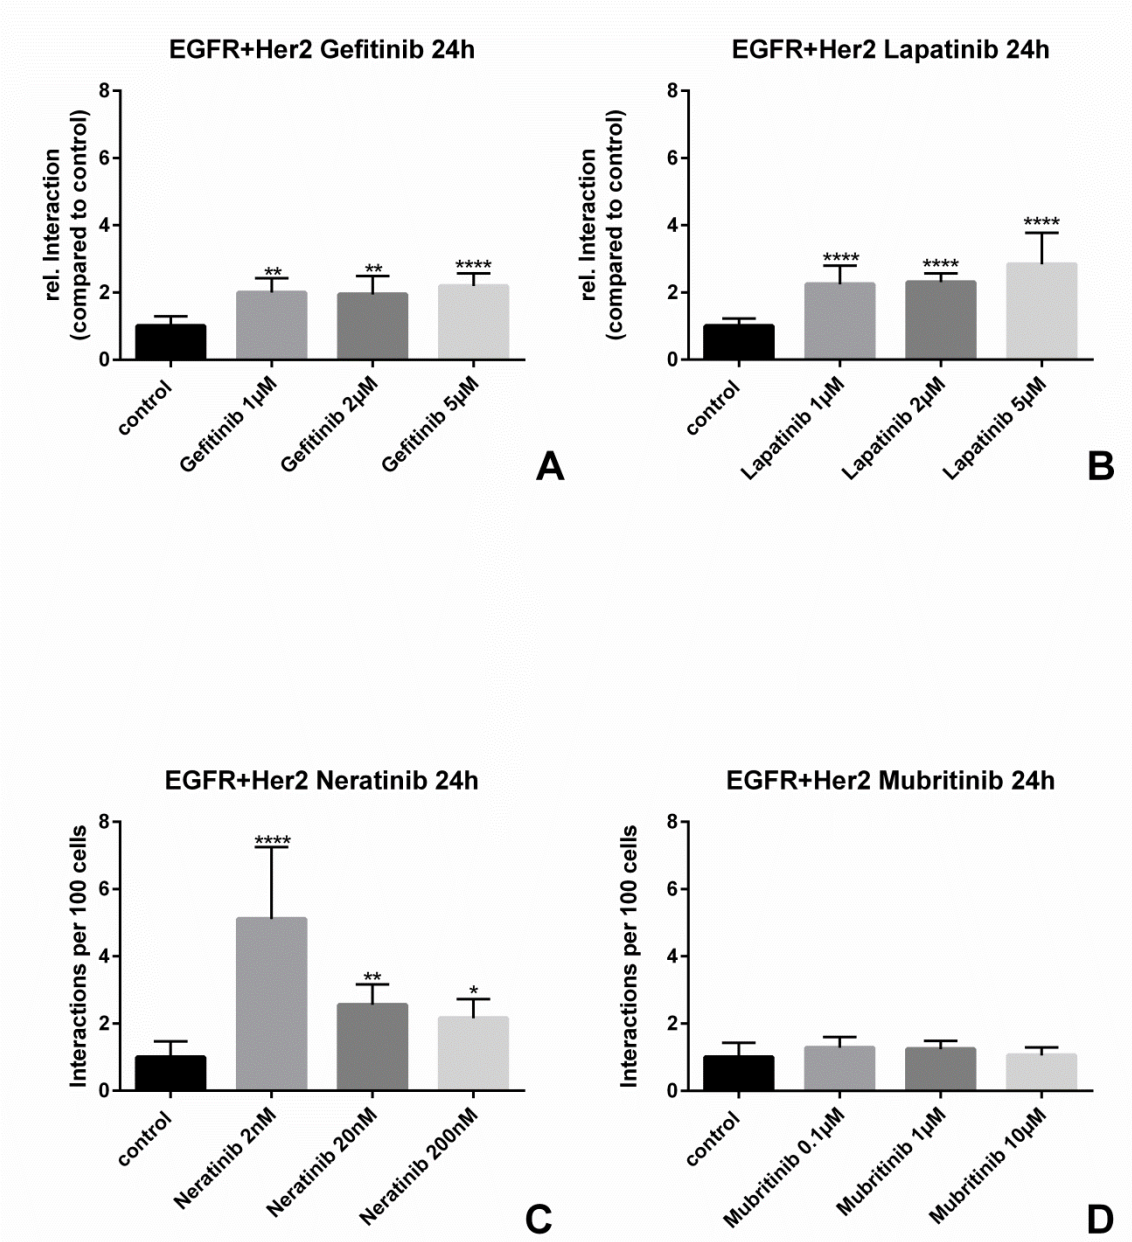

Supplementary Figure 1 **Formation of EGFR/HER2 dimers under TKI treatment.** SKBR3 cells were treated with the indicated concentrations of the 4 different tyrosine kinase inhibitors for 24h. The protein-protein interactions were measured using the Duolink proximity ligation assay. (A) Interaction of EGFR and HER2 under the influence of Gefitinib; (B) Interaction of EGFR and HER2 under the influence of Lapatinib; (C) Interaction of EGFR and HER2 under the influence of Neratinib; (D) Interaction of EGFR and HER2 under the influence of Mubritinib. (N=3)

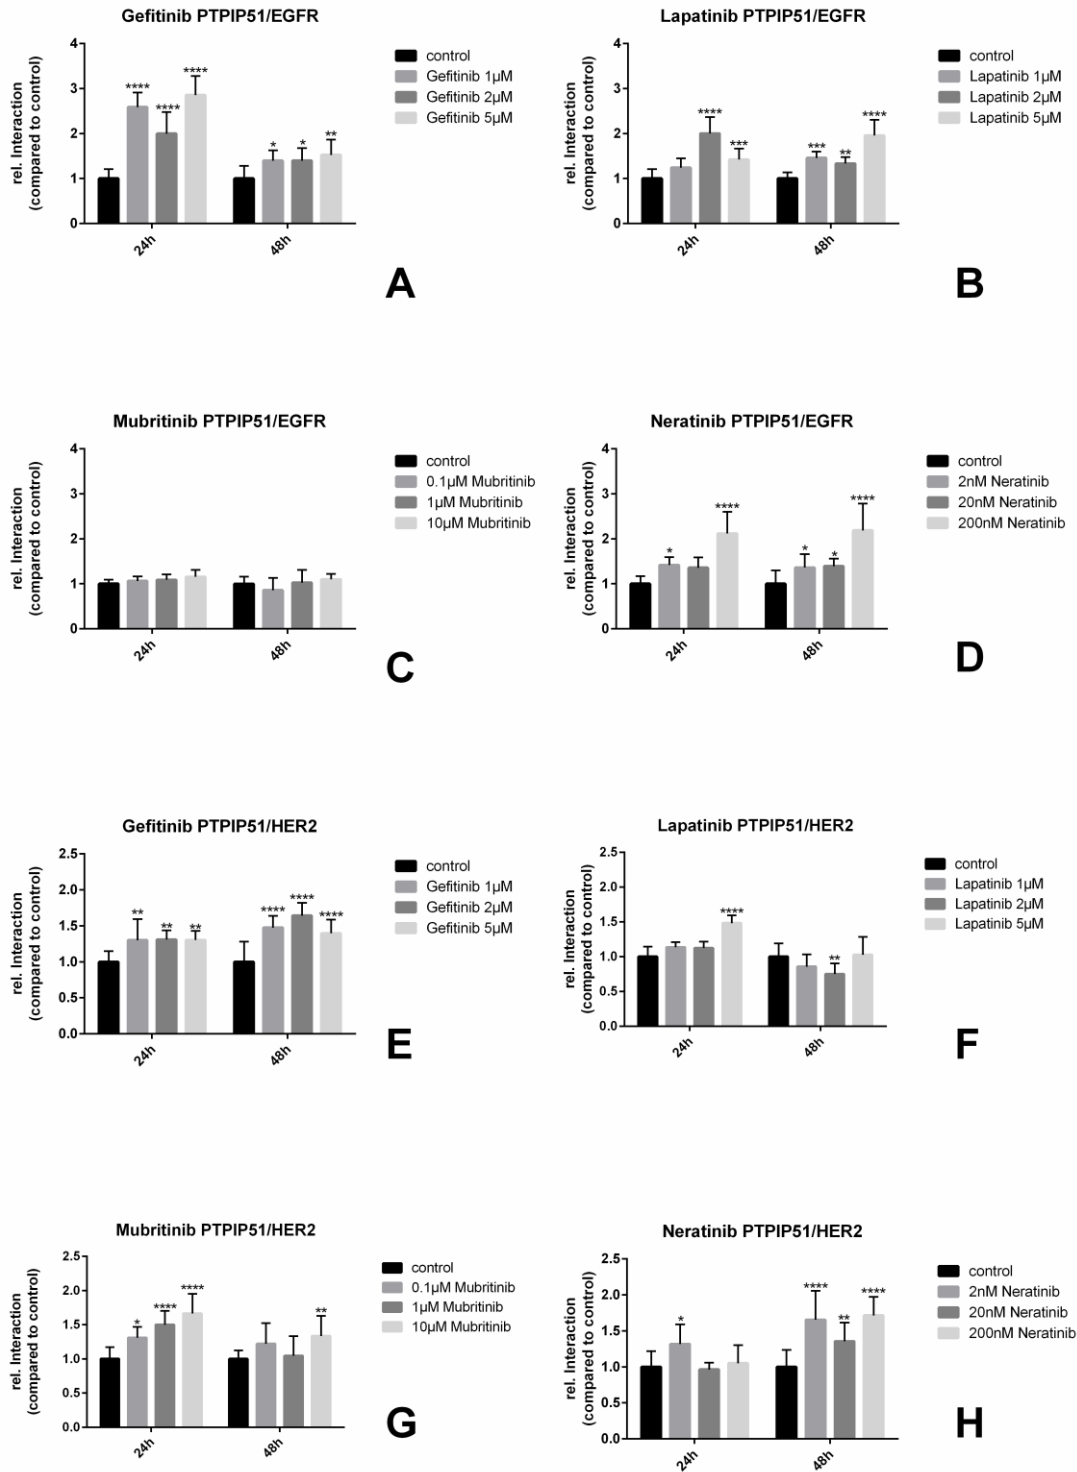

Supplementary Figure 2 **Interaction of PTIP51 with EGFR and HER2.** SKBR3 cells were treated with the indicated concentrations of the 4 different tyrosine kinase inhibitors for 24h and 48h. The protein-protein interactions were measured using the Duolink proximity ligation assay. (A) Interaction of PTIP51 and EGFR under the influence of Gefitinib; (B) Interaction of PTIP51 and EGFR under the influence of Lapatinib; (C) Interaction of PTIP51 and EGFR under the influence of Mubritinib; (D) Interaction of PTIP51 and EGFR under the influence of Neratinib. (E) Interaction of PTIP51 and HER2 under the influence of Gefitinib; (F) Interaction of PTIP51 and HER2 under the

influence of Lapatinib; (G) Interaction of PTPIP51 and HER2 under the influence of Mubritinib; (H) Interaction of PTPIP51 and HER2 under the influence of Neratinib. (N=3)

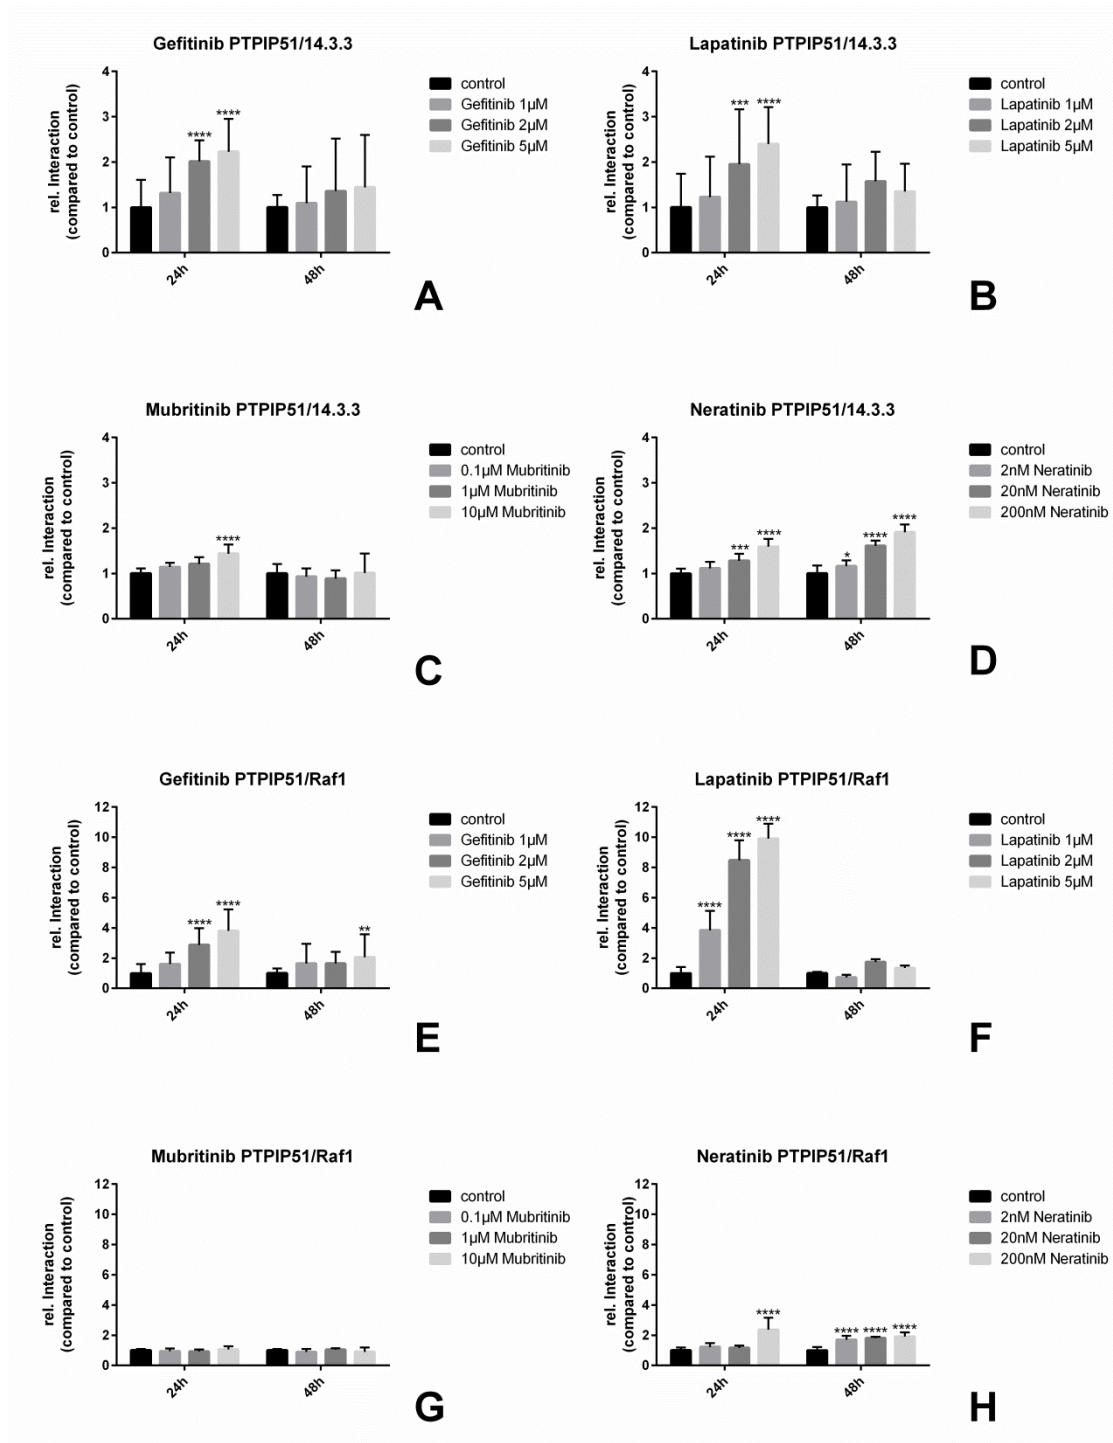

Supplementary Figure 3 **Interaction of PTPIP51 with 14.3.3 and Raf1.** SKBR3 cells were treated with the indicated concentrations of the 4 different tyrosine kinase inhibitors for 24h and 48h. The protein-protein interactions were measured using the Duolink proximity ligation assay. (A) Interaction of PTPIP51 and 14.3.3 under the influence of Gefitinib; (B) Interaction of PTPIP51 and 14.3.3 under the influence of Lapatinib; (C) Interaction of PTPIP51 and 14.3.3 under the influence of Mubritinib; (D) Interaction of PTPIP51 and 14.3.3 under the influence of Neratinib. (E) Interaction of

PTPIP51 and Raf1 under the influence of Gefitinib; (F) Interaction of PTPIP51 and Raf1 under the influence of Lapatinib; (G) Interaction of PTPIP51 and Raf1 under the influence of Mubritinib; (H) Interaction of PTPIP51 and Raf1 under the influence of Neratinib. (N=3)

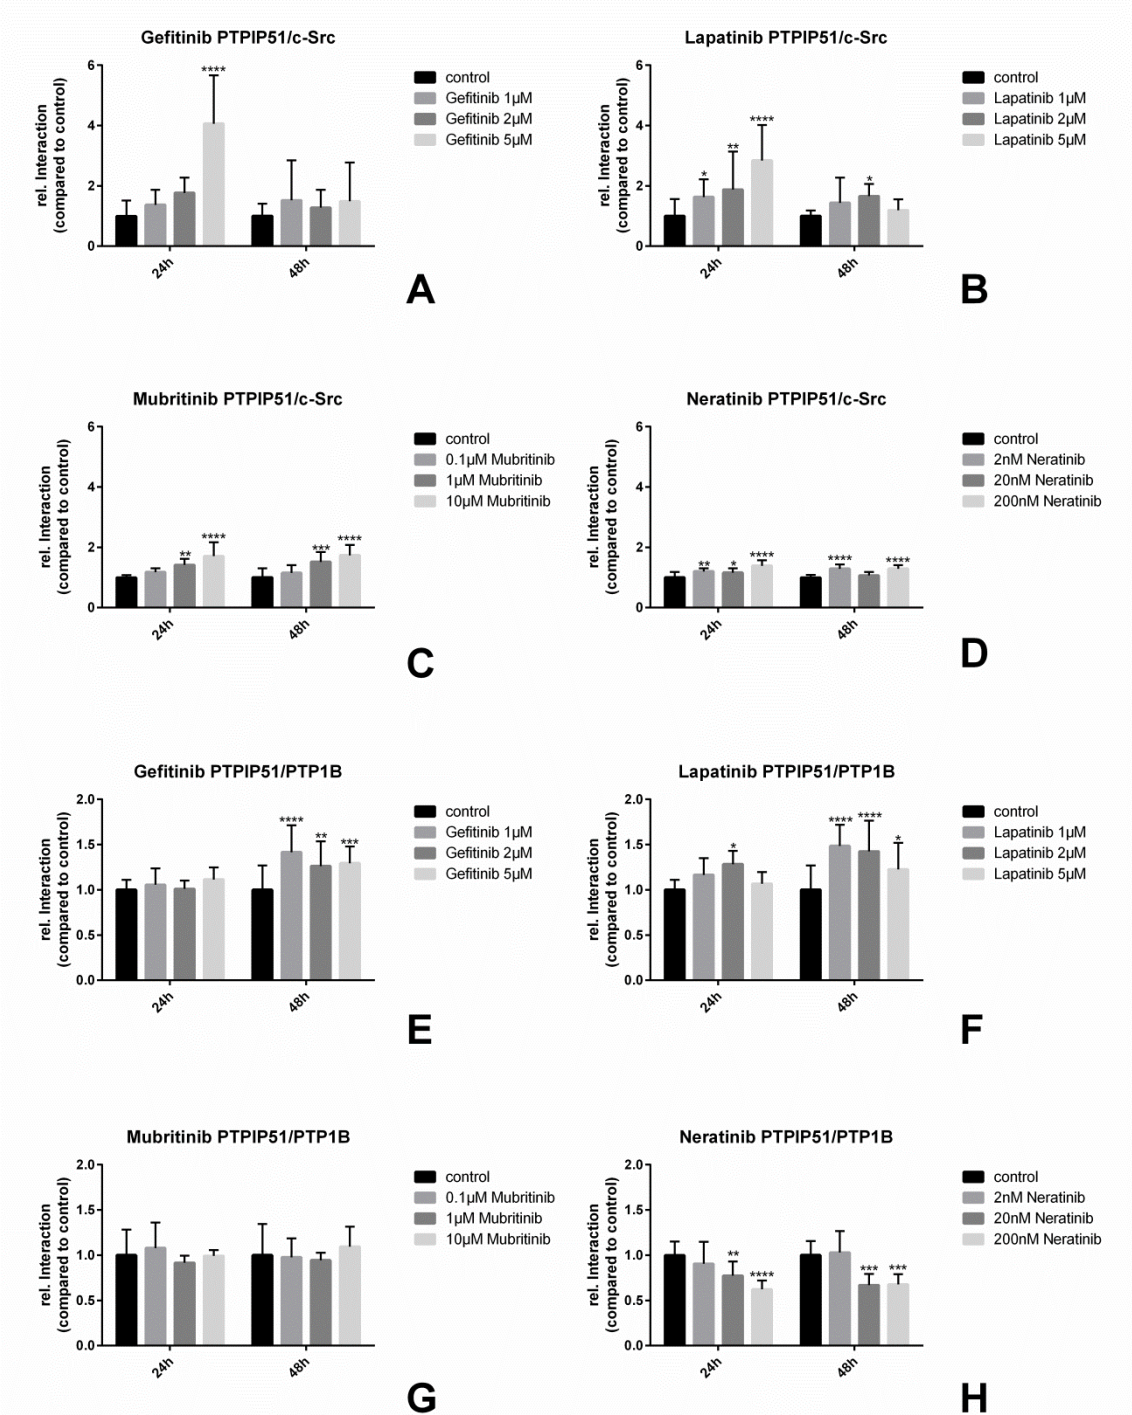

Supplementary Figure 4 **Interaction of PTPIP51 with c-Src and PTP1B**. SKBR3 cells were treated with the indicated concentrations of the 4 different tyrosine kinase inhibitors for 24h and 48h. The protein-protein interactions were measured using the Duolink proximity ligation assay. (A) Interaction of PTPIP51 and cSrc under the influence of Gefitinib; (B) Interaction of PTPIP51 and cSrc under the influence of Lapatinib; (C) Interaction of PTPIP51 and cSrc under the influence of

Mubritinib; (D) Interaction of PTPIP51 and cSrc under the influence of Neratinib. (E) Interaction of PTPIP51 and PTP1B under the influence of Gefitinib; (F) Interaction of PTPIP51 and PTP1B under the influence of Lapatinib; (G) Interaction of PTPIP51 and PTP1B under the influence of Mubritinib; (H) Interaction of PTPIP51 and PTP1B under the influence of Neratinib. (N=3)

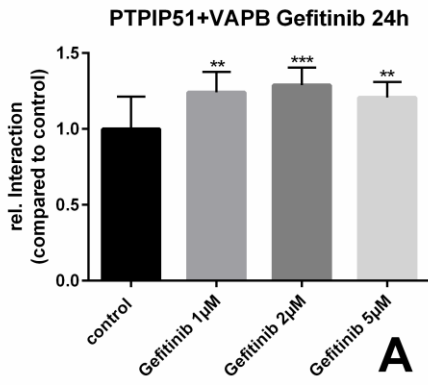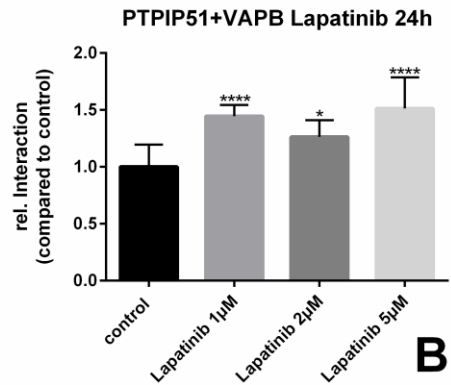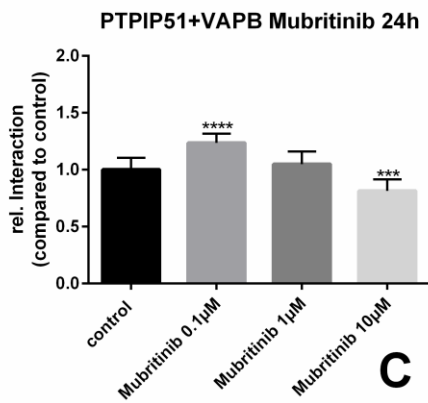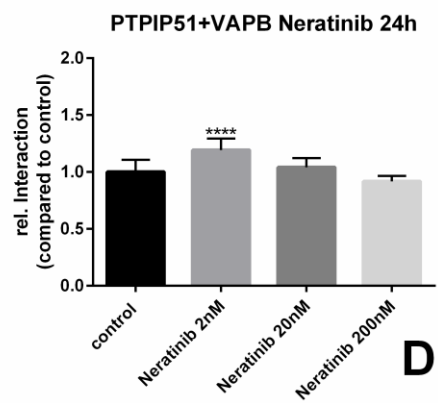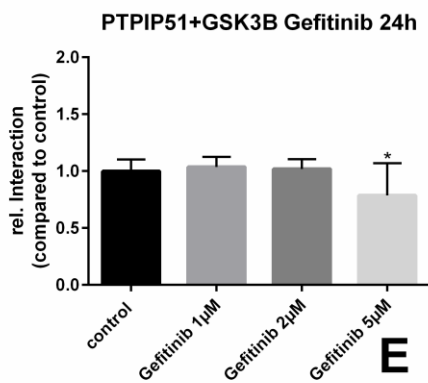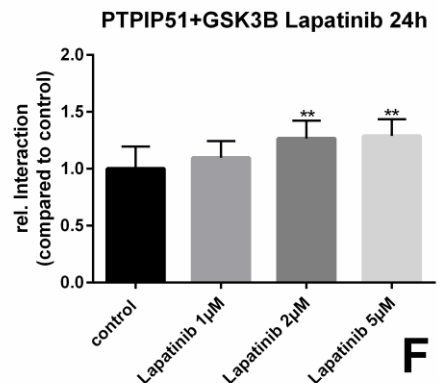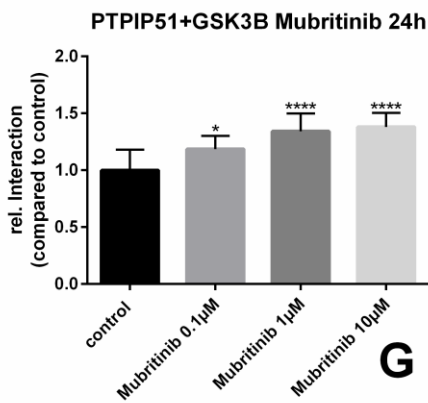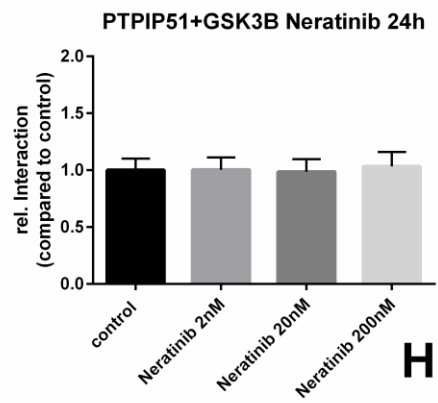

Supplementary Figure 5 **Interaction of PTPIP51 with VAPB and GSK3 $\beta$** . SKBR3 cells were treated with the indicated concentrations of the 4 different tyrosine kinase inhibitors for 24h. The protein-protein

interactions were measured using the Duolink proximity ligation assay. (A) Interaction of PTPIP51 and VAPB under the influence of Gefitinib; (B) Interaction of PTPIP51 and VAPB under the influence of Lapatinib; (C) Interaction of PTPIP51 and VAPB under the influence of Mubritinib; (D) Interaction of PTPIP51 and VAPB under the influence of Neratinib. (E) Interaction of PTPIP51 and GSK3 $\beta$  under the influence of Gefitinib; (F) Interaction of PTPIP51 and GSK3 $\beta$  under the influence of Lapatinib; (G) Interaction of PTPIP51 and GSK3 $\beta$  under the influence of Mubritinib; (H) Interaction of PTPIP51 and GSK3 $\beta$  under the influence of Neratinib. (N=3)



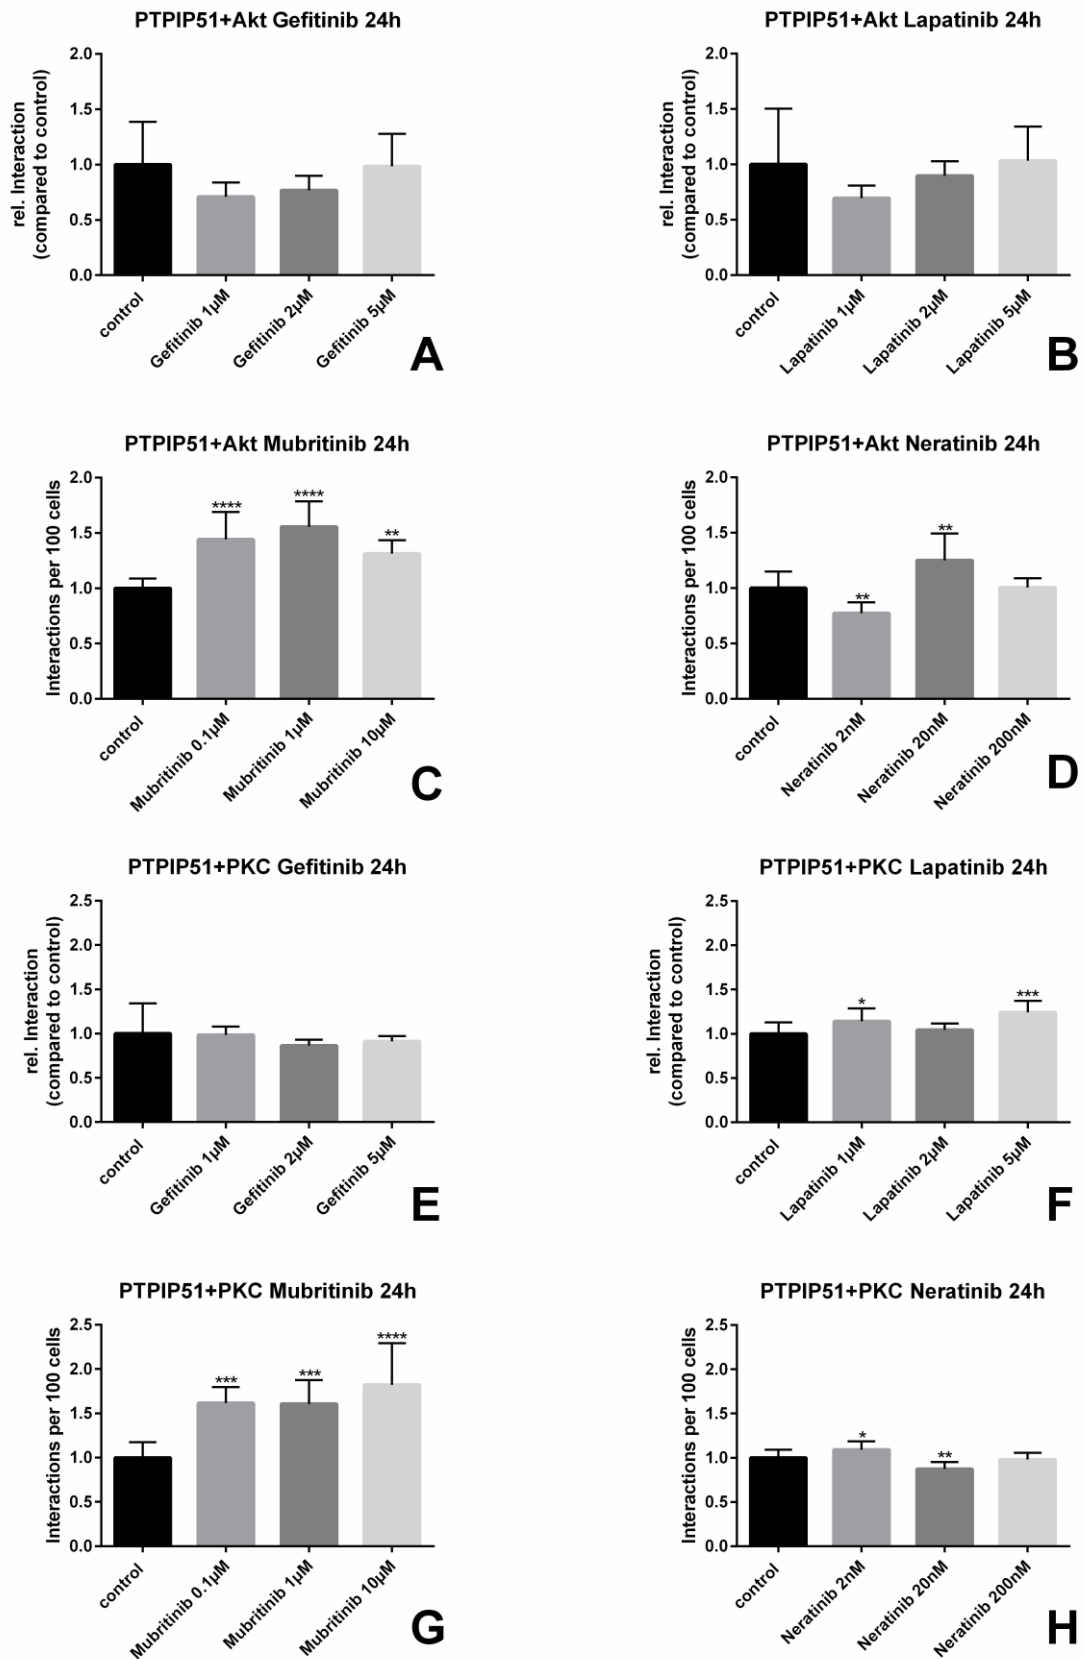

Supplementary Figure 6 **Interaction of PTIP51 with Akt and PKC.** SKBR3 cells were treated with the indicated concentrations of the 4 different tyrosine kinase inhibitors for 24h. The protein-protein

interactions were measured using the Duolink proximity ligation assay. (A) Interaction of PTPIP51 and Akt under the influence of Gefitinib; (B) Interaction of PTPIP51 and Akt under the influence of Lapatinib; (C) Interaction of PTPIP51 and Akt under the influence of Mubritinib; (D) Interaction of PTPIP51 and Akt under the influence of Neratinib. (E) Interaction of PTPIP51 and PKC under the influence of Gefitinib; (F) Interaction of PTPIP51 and PKC under the influence of Lapatinib; (G) Interaction of PTPIP51 and PKC under the influence of Mubritinib; (H) Interaction of PTPIP51 and PKC under the influence of Neratinib. (N=3)

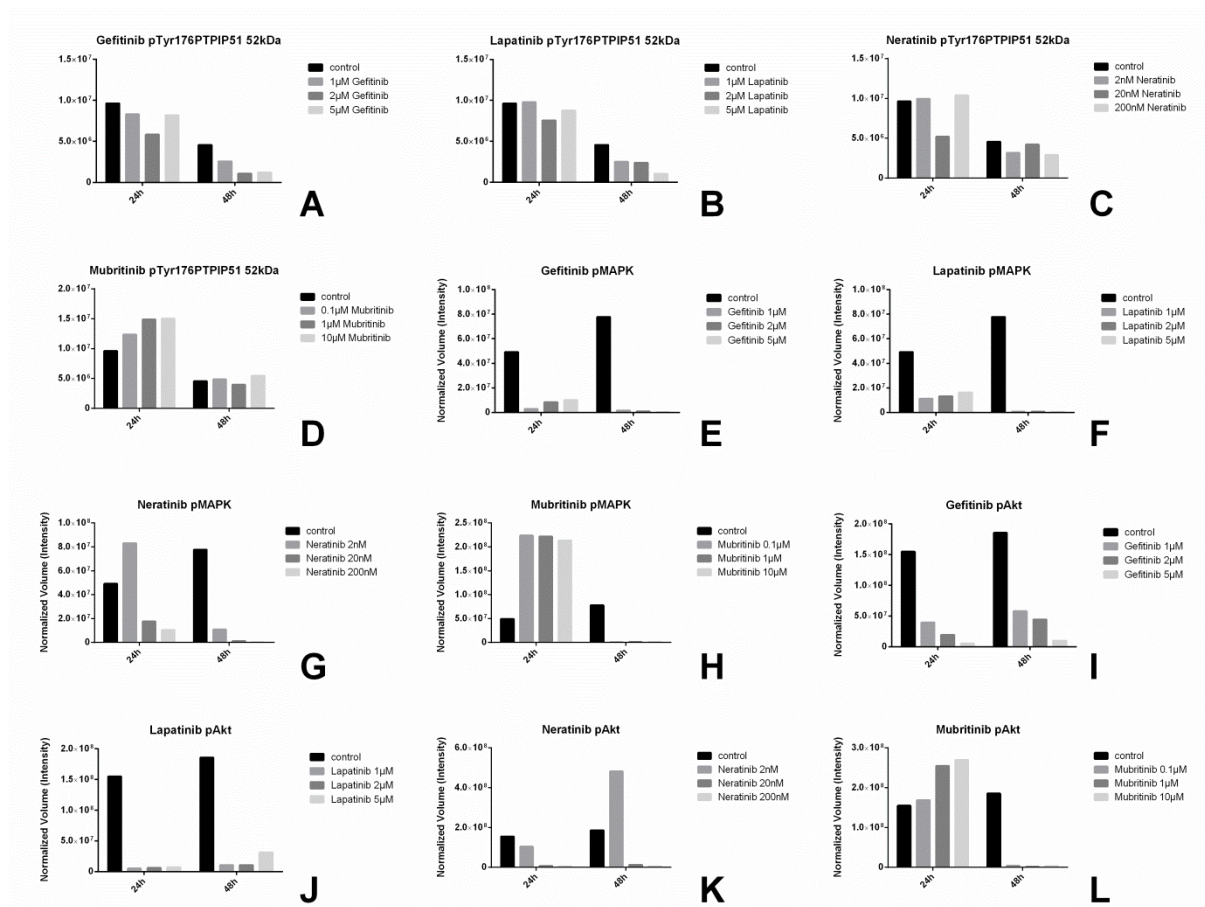

Supplementary Figure 7 Evaluation of immunoblots of SK-BR3 cells under Gefitinib, Lapatinib, Neratinib and Mubritinib treatment for 24h and 48h. Evaluation of pTyr176PTPIP51 (A-D). Evaluation of pMAPK (E-H). Evaluation of pAkt (I-L). Immunoblots were normalized to their corresponding stain free blot using ImageLab.

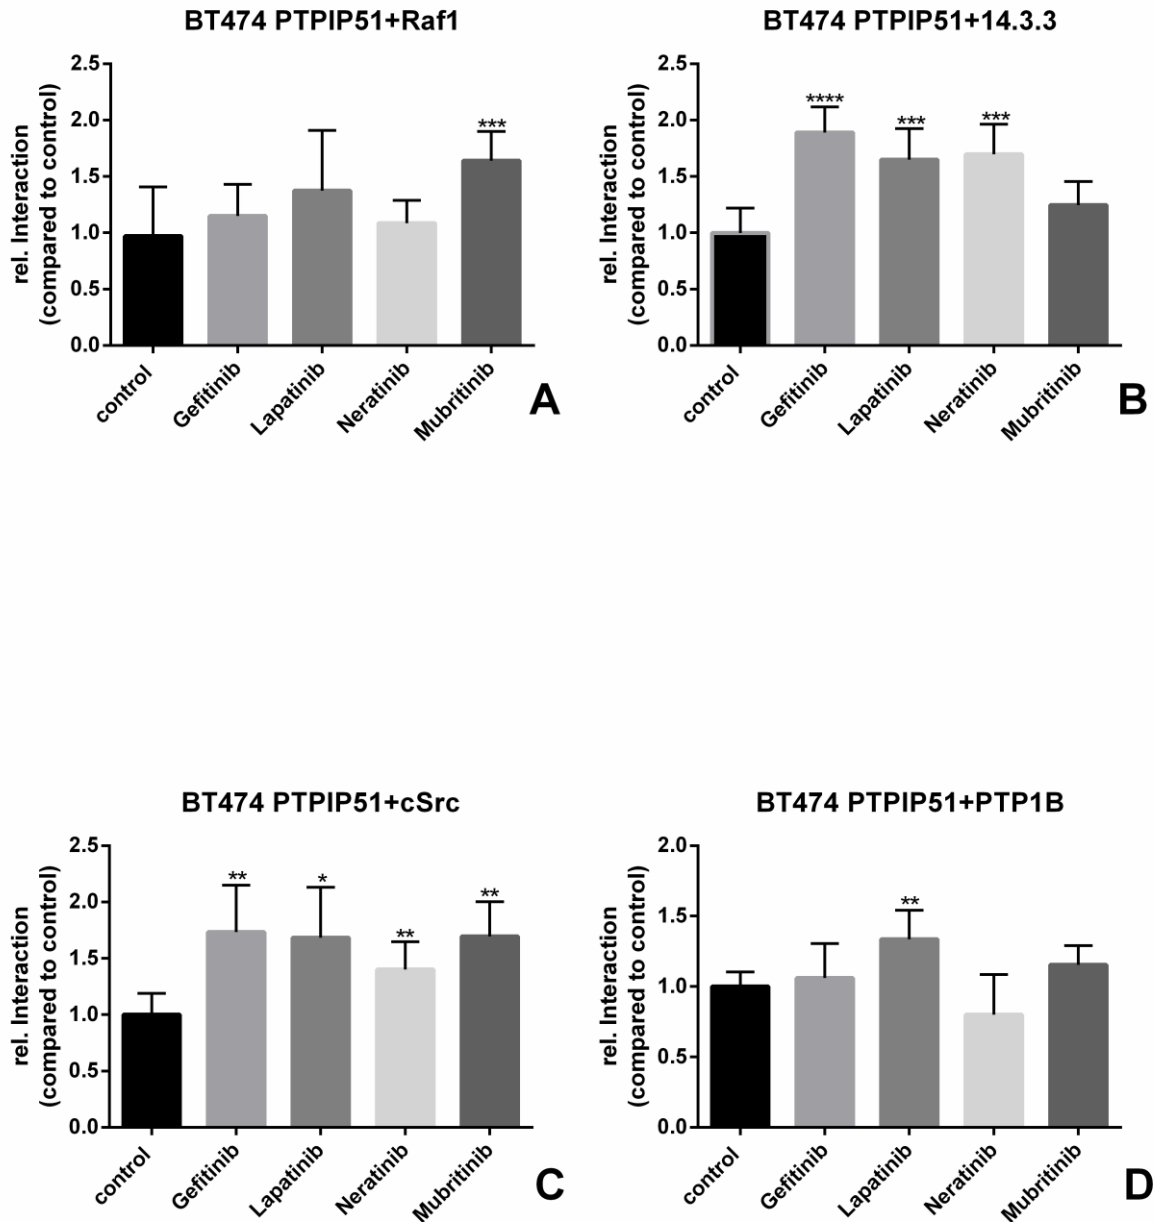

Supplementary Figure 8 **Interactions of PTPIP51 with different interaction partners in BT474 treated for 48h.** Interaction of PTPIP51 and Raf1 in BT474 treated with 5 $\mu$ M Gefitinib, 5 $\mu$ M Lapatinib, 200nM Neratinib or 10 $\mu$ M Mubritinib for 48h (A). Interaction of PTPIP51 and 14.3.3 in BT474 treated with 5 $\mu$ M Gefitinib, 5 $\mu$ M Lapatinib, 200nM Neratinib or 10 $\mu$ M Mubritinib for 48h (B). Interaction of PTPIP51 and cSrc in BT474 treated with 5 $\mu$ M Gefitinib, 5 $\mu$ M Lapatinib, 200nM Neratinib or 10 $\mu$ M Mubritinib for 48h (C). Interaction of PTPIP51 and PTP1B in BT474 treated with 5 $\mu$ M Gefitinib, 5 $\mu$ M Lapatinib, 200nM Neratinib or 10 $\mu$ M Mubritinib for 48h (D).
